# Supplementary material for: Carbohydrates, glycemic index, glycemic load, and breast cancer risk: a systematic review and dose–response meta-analysis of prospective studies
Source: Oxford University Press journal article supplement (doi:10.1093/nutrit/nux010), 2017-02-22
Supplement: nux010_Supp.zip [file nux010_Supp.zip]

## **Online Supplemental Material**

### **Carbohydrates, glycemic index, glycemic load, sugars and breast cancer risk: a systematic review and dose-response meta-analysis of prospective studies**

Sabrina Schlesinger, Doris SM Chan, Snieguole Vingeliene, Ana R Vieira, Leila Abar,  
Elli Polemiti, Christophe A T Stevens, Darren C Greenwood, Dagfinn Aune, Teresa  
Norat

**Supplemental Table 1:** Important confounders considered of each study included in the meta-analysis

| Study                          | Confounders |         |        |                    |                  |                 |        |           |                     |                   |         |                |               |                |                           |
|--------------------------------|-------------|---------|--------|--------------------|------------------|-----------------|--------|-----------|---------------------|-------------------|---------|----------------|---------------|----------------|---------------------------|
|                                | Age         | HRT use | Parity | Age at first birth | Age at menopause | Age at menarche | OC use | Education | BMI or weigh+height | Physical activity | Smoking | Alcohol intake | Energy intake | Family history | History of breast disease |
| Farvid et al., 2014, USA       | ✓           | ✓       | ✓      | ✓                  | ✓                | ✓               | ✓      |           | ✓                   |                   | ✓       | ✓              | ✓             | ✓              | ✓                         |
| Romieu et al., 2012, Europe    | ✓           | ✓       |        | ✓                  | ✓                | ✓               | ✓      | ✓         | ✓                   | ✓                 | ✓       | ✓              | ✓             |                |                           |
| Tasevska et al, 2012 USA       | ✓           |         |        |                    |                  |                 |        |           | ✓                   | ✓                 | ✓       | ✓              | ✓             | ✓              |                           |
| Shikany et al., 2011, USA      | ✓           | ✓       | ✓      | ✓                  | ✓                | ✓               | ✓      | ✓         | ✓                   | ✓                 | ✓       | ✓              | ✓             | ✓              |                           |
| George et al., 2009, USA       | ✓           | ✓       |        |                    |                  |                 |        | ✓         | ✓                   | ✓                 | ✓       | ✓              | ✓             | ✓              |                           |
| Larsson et al., 2009, Sweden   | ✓           | ✓       | ✓      | ✓                  | ✓                | ✓               | ✓      | ✓         | ✓                   |                   |         | ✓              | ✓             | ✓              |                           |
| Wen et al., 2009, China        | ✓           |         |        | ✓                  |                  |                 |        | ✓         | ✓                   | ✓                 |         |                | ✓             | ✓              | ✓                         |
| Sieri et al 2007, Italy        | ✓           |         | ✓      |                    |                  | ✓               | ✓      | ✓         | ✓                   |                   | ✓       | ✓              | ✓             |                |                           |
| Nielsen et al., 2005 Denmark   | ✓           |         |        |                    |                  |                 |        |           | ✓                   |                   |         |                | ✓             |                |                           |
| Silvera et al., 2005, Canada   | ✓           | ✓       | ✓      | ✓                  |                  | ✓               | ✓      |           | ✓                   |                   |         | ✓              | ✓             | ✓              | ✓                         |
| Holmes et al., 2004, USA       | ✓           | ✓       | ✓      | ✓                  | ✓                | ✓               |        |           | ✓                   |                   |         | ✓              | ✓             | ✓              | ✓                         |
| Higginbotham et al., 2004, USA | ✓           | ✓       | ✓      | ✓                  |                  | ✓               | ✓      |           | ✓                   | ✓                 | ✓       | ✓              | ✓             | ✓              | ✓                         |
| Jonas et al., 2003, USA        | ✓           | ✓       | ✓      | ✓                  | ✓                | ✓               | ✓      | ✓         | ✓                   | ✓                 | ✓       | ✓              | ✓             | ✓              |                           |
| Horn-Ross et al., 2002, USA    | ✓           |         | ✓      | ✓                  |                  | ✓               |        |           | ✓                   | ✓                 |         |                | ✓             | ✓              |                           |

|                                       |   |   |   |   |   |   |   |  |  |   |   |   |   |
|---------------------------------------|---|---|---|---|---|---|---|--|--|---|---|---|---|
| Sieri et al.,<br>2002, Italy          | ✓ | ✓ |   |   |   | ✓ | ✓ |  |  | ✓ |   |   |   |
| Kushi et al.,<br>1995,<br>USA         | ✓ |   |   |   |   |   | ✓ |  |  | ✓ |   |   |   |
| Barrett-Connor<br>et al. 1993,<br>USA | ✓ | ✓ |   | ✓ |   |   | ✓ |  |  | ✓ | ✓ |   |   |
| Kushi et al,<br>1992<br>USA           | ✓ |   | ✓ | ✓ | ✓ |   | ✓ |  |  | ✓ | ✓ | ✓ | ✓ |
| Knekt et al.,<br>1990<br>Finland      | ✓ |   |   |   |   |   | ✓ |  |  |   | ✓ |   |   |

**Supplemental Table 2.** Summary relative risks (RR) and 95% confidence intervals (95% CI) of dose-response meta-analyses of carbohydrates, GI, GL and breast cancer by adjustment for important confounders

|                                   | Carbohydrates (per 50 g/day) |    |              |                |                 | GI (per 10 units/day)  |    |              |                |                 | GL (per 50 units/d)    |    |              |                |                 |
|-----------------------------------|------------------------------|----|--------------|----------------|-----------------|------------------------|----|--------------|----------------|-----------------|------------------------|----|--------------|----------------|-----------------|
|                                   | Summary RR<br>(95% CI)       | n  | $I^2$<br>(%) | $p_{within}^a$ | $p_{between}^b$ | Summary RR<br>(95% CI) | n  | $I^2$<br>(%) | $p_{within}^a$ | $p_{between}^b$ | Summary RR<br>(95% CI) | n  | $I^2$<br>(%) | $p_{within}^a$ | $p_{between}^b$ |
| <b>All studies</b>                | 1.00 (0.96-1.05)             | 11 | 57.3         | .009           |                 | 1.04 (1.00-1.07)       | 10 | 27.2         | .194           | -               | 1.01 (0.98-1.04)       | 11 | 42.7         | .065           |                 |
| <b>Adjustment for confounders</b> |                              |    |              |                |                 |                        |    |              |                |                 |                        |    |              |                |                 |
| HRT use                           |                              |    |              |                |                 |                        |    |              |                |                 |                        |    |              |                |                 |
| Yes                               | 1.00 (0.96-1.04)             | 7  | 54.1         | .042           | .821            | 1.03 (1.00-1.07)       | 8  | 16.4         | .301           | .821            | 1.00 (0.99-1.01)       | 9  | 0            | .543           | .269            |
| No                                | 0.89 (0.68-1.16)             | 4  | 70.5         | .017           |                 | 1.28 (0.66-2.46)       | 2  | 74.9         | .046           |                 | 1.51 (0.69-3.31)       | 2  | 87.9         | .004           |                 |
| Parity                            |                              |    |              |                |                 |                        |    |              |                |                 |                        |    |              |                |                 |
| Yes                               | 1.00 (0.95-1.06)             | 8  | 58.4         | .019           | .949            | 1.03 (0.98-1.08)       | 7  | 39.2         | .130           | .949            | 1.01 (0.97-1.07)       | 8  | 56.7         | .024           | .912            |
| No                                | 0.98 (0.85-1.13)             | 3  | 65.0         | .058           |                 | 1.06 (1.01-1.10)       | 3  | 0            | .676           |                 | 1.01 (0.97-1.05)       | 3  | 0            | .547           |                 |
| Age at first birth                |                              |    |              |                |                 |                        |    |              |                |                 |                        |    |              |                |                 |
| Yes                               | 1.00 (0.97-1.02)             | 8  | 7.2          | .374           | .580            | 1.03 (1.00-1.06)       | 8  | 14.6         | .315           | .580            | 1.00 (0.99-1.01)       | 9  | 0            | .561           | .950            |
| No                                | 0.89 (0.49-1.65)             | 3  | 86.7         | .001           |                 | 1.31 (0.75-2.29)       | 2  | 68.8         | .075           |                 | 1.46 (0.62-3.42)       | 2  | 90.6         | .001           |                 |
| Age at menopause                  |                              |    |              |                |                 |                        |    |              |                |                 |                        |    |              |                |                 |
| Yes                               | 1.01 (0.96-1.05)             | 7  | 56.0         | .034           | .715            | 1.05 (1.01-1.08)       | 6  | 0            | .602           | .715            | 1.01 (0.98-1.03)       | 6  | 19.4         | .287           | .844            |
| No                                | 0.91 (0.76-1.08)             | 4  | 68.2         | .024           |                 | 1.02 (0.93-1.12)       | 4  | 56.2         | .077           |                 | 1.03 (0.92-1.16)       | 5  | 64.1         | .025           |                 |
| Age at menarche                   |                              |    |              |                |                 |                        |    |              |                |                 |                        |    |              |                |                 |
| Yes                               | 0.99 (0.96-1.03)             | 8  | 35.7         | .143           | .655            | 1.03 (0.99-1.08)       | 8  | 39.0         | .119           | .655            | 1.01 (0.97-1.05)       | 9  | 51.9         | .034           | .763            |
| No                                | 1.06 (0.72-1.56)             | 3  | 83.3         | .003           |                 | 1.05 (0.97-1.13)       | 2  | 0            | .393           |                 | 0.99 (0.93-1.05)       | 2  | 0            | .429           |                 |
| OC use                            |                              |    |              |                |                 |                        |    |              |                |                 |                        |    |              |                |                 |
| Yes                               | 0.99 (0.95-1.04)             | 6  | 51.1         | .069           | .807            | 1.02 (0.98-1.07)       | 7  | 35.7         | .155           | .807            | 1.02 (0.96-1.08)       | 8  | 55.2         | .029           | .684            |
| No                                | 1.04 (0.89-1.22)             | 5  | 69.5         | .011           |                 | 1.07 (1.01-1.13)       | 3  | 0            | .512           |                 | 1.00 (0.99-1.01)       | 3  | 0            | .679           |                 |
| Education                         |                              |    |              |                |                 |                        |    |              |                |                 |                        |    |              |                |                 |
| Yes                               | 1.02 (0.97-1.07)             | 5  | 42.5         | .131           | .355            | 1.04 (1.01-1.08)       | 7  | 9.1          | .360           | .355            | 1.03 (0.98-1.09)       | 8  | 52.5         | .039           | .388            |
| No                                | 0.98 (0.90-1.07)             | 6  | 64.8         | .014           |                 | 1.03 (0.95-1.12)       | 3  | 58.2         | .091           |                 | 1.00 (0.99-1.01)       | 3  | 0            | .541           |                 |
| BMI                               |                              |    |              |                |                 |                        |    |              |                |                 |                        |    |              |                |                 |
| Yes                               | 1.01 (0.97-1.04)             | 9  | 44.5         | .071           | .047            | 1.04 (1.00-1.07)       | 10 | 27.2         | .194           | -               | 1.02 (0.97-1.07)       | 11 | 47.2         | .014           | -               |
| No                                | 0.68 (0.52-0.88)             | 2  | 0            | .557           |                 | -                      | 0  | -            | -              |                 | -                      | 0  | -            | -              |                 |
| Physical activity                 |                              |    |              |                |                 |                        |    |              |                |                 |                        |    |              |                |                 |
| Yes                               | 1.01 (0.98-1.04)             | 3  | 0            | .593           | .484            | 1.04 (1.00-1.07)       | 5  | 0            | .590           | .484            | 1.01 (0.98-1.04)       | 6  | 0            | .812           | .728            |
| No                                | 0.99 (0.91-1.08)             | 8  | 66.7         | .004           |                 | 1.05 (0.97-1.13)       | 5  | 57.3         | .053           |                 | 1.03 (0.94-1.12)       | 5  | 73.2         | .005           |                 |
| Smoking                           |                              |    |              |                |                 |                        |    |              |                |                 |                        |    |              |                |                 |
| Yes                               | 1.00 (0.96-1.05)             | 4  | 62.7         | .045           | .569            | 1.04 (1.00-1.08)       | 6  | 14.7         | .320           | .569            | 1.00 (0.95-1.06)       | 7  | 55.3         | .037           | .868            |
| No                                | 1.03 (0.95-1.13)             | 7  | 59.7         | .021           |                 | 1.03 (0.96-1.10)       | 4  | 49.4         | .115           |                 | 1.01 (0.97-1.06)       | 4  | 24.4         | .265           |                 |
| Alcohol intake                    |                              |    |              |                |                 |                        |    |              |                |                 |                        |    |              |                |                 |
| Yes                               | 1.00 (0.96-1.04)             | 9  | 55.2         | .022           | .901            | 1.04 (1.00-1.08)       | 9  | 33.1         | .153           | .901            | 1.01 (0.97-1.04)       | 10 | 47.5         | .047           | .735            |
| No                                | 0.89 (0.60-1.33)             | 2  | 81.9         | .019           |                 | 0.97 (0.81-1.18)       | 1  | -            | -              |                 | 1.05 (0.89-1.24)       | 1  | -            | -              |                 |

|                                 |                  |   |      |      |      |                  |   |      |      |      |                  |   |      |      |      |
|---------------------------------|------------------|---|------|------|------|------------------|---|------|------|------|------------------|---|------|------|------|
| Family history of breast cancer |                  |   |      |      |      |                  |   |      |      |      |                  |   |      |      |      |
| Yes                             | 0.99 (0.96-1.02) | 7 | 9.4  | .357 | .869 | 1.02 (0.99-1.06) | 8 | 4.9  | .392 | .360 | 1.00 (0.99-1.01) | 9 | 0    | .563 | .541 |
| No                              | 0.94 (0.68-1.29) | 4 | 81.4 | .001 |      | 1.31 (0.75-2.29) | 2 | 69.5 | .070 |      | 1.48 (0.66-3.35) | 2 | 89.7 | .002 |      |
| History of breast disease       |                  |   |      |      |      |                  |   |      |      |      |                  |   |      |      |      |
| Yes                             | 0.98 (0.94-1.02) | 5 | 57.3 | .009 | .461 | 1.02 (0.97-1.06) | 5 | 19.3 | .292 | .238 | 1.00 (0.99-1.01) | 5 | 0    | .779 | .461 |
| No                              | 1.01 (0.93-1.10) | 6 | 72.4 | .003 |      | 1.05 (1.01-1.10) | 5 | 21.6 | .277 |      | 1.04 (0.97-1.12) | 6 | 64.4 | .015 |      |

CI, confidence interval; ER, oestrogen receptor; GI, glycemic index; GL, glycemic load; n, number of studies; PR, progesterone receptor; RR, relative risk

<sup>a</sup> p<sub>within</sub>, p for heterogeneity within each subgroup

<sup>b</sup> p<sub>between</sub>, p for heterogeneity between subgroups with meta-regression
